# Supplementary material for: Locust bean gum/gellan gum double-network hydrogels with superior self-healing and pH-driven shape-memory properties
Source: Royal Society of Chemistry journal article supplement (doi:10.1039/c9sm00861f), 2019-01-01
Supplement: c9sm00861f1.pdf [file c9sm00861f1.pdf]

## Supporting Information

# Locust Bean Gum/Gellan Gum Double-Network Hydrogels with Superior Self-Healing and pH-Driven Shape-Memory Properties

### 1. Rheological properties of LBG SN hydrogel

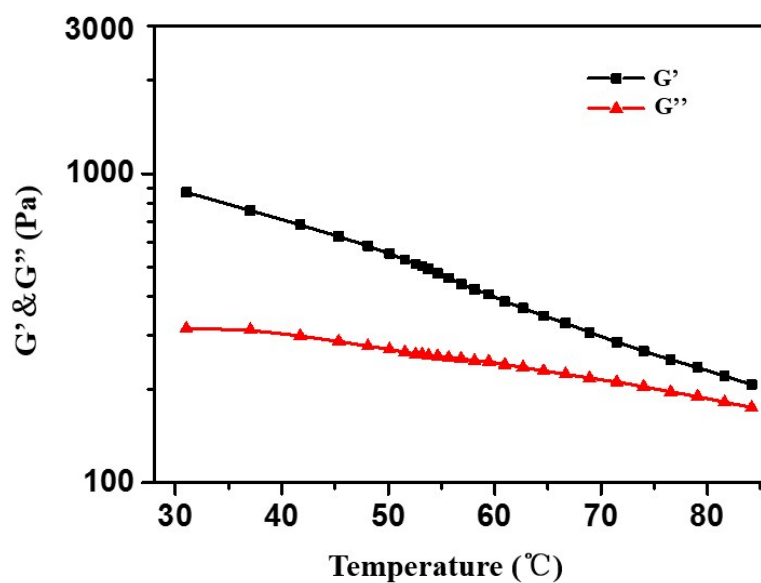

**Figure S1.** Storage ( $G'$ ) and loss modulus ( $G''$ ) of the LBG SN hydrogel as a function of temperature.

## 2. Shape memory process of LBG/Gg DN hydrogels

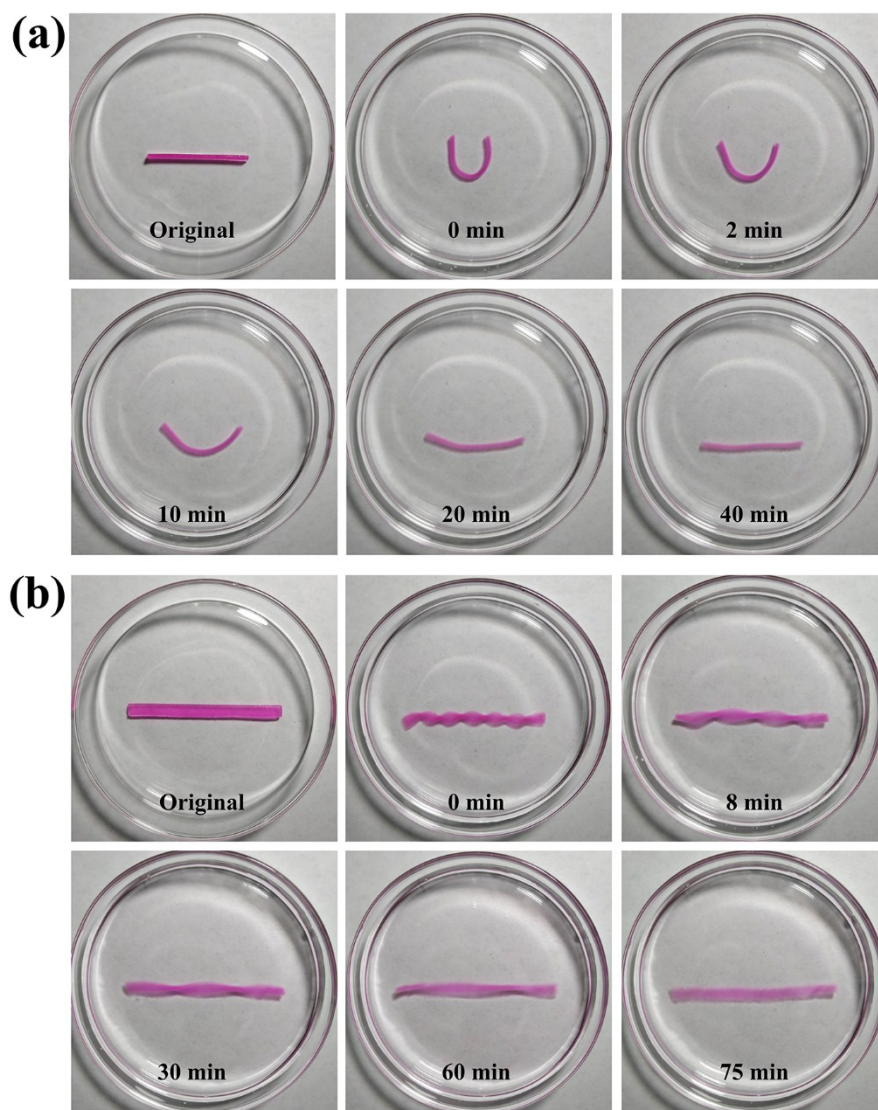

**Figure S2.** Photos showing the shape memory behaviors of the LBG/Gg DN hydrogels: (a) U shape and (b) spiral shape. The entire process is carried out at room temperature and the size of the hydrogels in (a) and (b) are  $40 \times 4 \times 1.5 \text{ mm}^3$  and  $60 \times 4 \times 1.5 \text{ mm}^3$ , respectively.
